# Supplementary material for: Effect of Hydrothermal Carbonization on Fuel and Combustion Properties of Shrimp Shell Waste
Source: MDPI journal article supplement (doi:10.3390/en16145534), 2023-07-21
Supplement: s1 [file s1]

Supplementary Information

**Evaluation of Fuel Properties of Hydrothermal Carbonization-derived Shrimp Shell Hydrochar**

Swarna Saha, Md Tahmid Islam, Joshua Calhoun, and M. Toufiq Reza\*

Department of Biomedical and Chemical Engineering and Sciences, Florida Institute of Technology, Melbourne, FL 32901, USA

\* Corresponding Author: email: treza@fit.edu, phone: +1-321-674-8578

**Table Caption**

**TableS 1**            Slagging, fouling, sagging viscosity and alkali indices, Cl content equation and limit for detection.

**Figure captions**

**FigureS1**            FTIR spectra for raw SS and hydrochar at different temperature.

**FigureS2**            TG thermogram results for raw SS and hydrochars at different temperatures.

**TableS 1** Slagging, fouling, sagging viscosity and alkali indices, Cl content equation and limit for detection [1].

| Slagging /fouling index  | Equation                                                  | Limit                                                                                                                      |
|--------------------------|-----------------------------------------------------------|----------------------------------------------------------------------------------------------------------------------------|
| Slagging Index           | $SI = (B/A) \times \text{wt.\% S in dry fuel}$            | $SI < 0.6$ low slagging inclination<br>$SI = 0.6$ to $2.0$ medium<br>$SI = 2.0$ to $2.6$ high<br>$SI > 2.6$ extremely high |
| Fouling Index            | $FI = (B/A) \times (Na_2O + K_2O)$                        | $FI \leq 0.6$ lower fouling inclination<br>$0.6 < FI < 40$ medium<br>$FI \geq 40$ high                                     |
| Slagging Viscosity Index | $SV = (SiO_2 \times 100) / (SiO_2 + MgO + CaO + Fe_2O_3)$ | $SV > 72$ low slagging inclination<br>$65 \leq SV \leq 72$ moderate<br>$SV < 65$ high                                      |
| Alkali Index             | $AI = (Na_2O + K_2O) \text{ in kg/GJ}$                    | $0.17 < AI < 0.34$ slagging/fouling probable<br>$AI \geq 0.34$ slagging/fouling is certain                                 |
| Chlorine Content         | Cl as received (%)                                        | $Cl < 0.2-0.3$ low slagging inclination<br>$0.2 < Cl < 0.3$ medium<br>$0.3 < Cl < 0.5$ high<br>$Cl > 0.5$ extremely high   |

## FTIR Result Analysis

The FTIR spectra of raw shrimp shell (SS) to hydrochars at various temperatures are displayed in **Figure S1**, which gives a qualitative overview of the surface functionalities present in the samples. All of the samples displayed two adsorption peaks at  $2923\text{ cm}^{-1}$  and  $2855\text{ cm}^{-1}$ , ascribed from C-H asymmetric and symmetric axial deformation in  $\text{CH}_2$  due to the existence of aliphatic structures derived from lipids in SS, respectively [2-4]. However, a peak at around  $1650\text{ cm}^{-1}$  was seen only for SS-110 which is attributed from amide I ( $\text{C}=\text{O}$ ) and N-H angular deformation in primary amine and showed non-existent immergence for other hydrochar samples[2, 5]. Except for the raw SS, another persistent peak at  $1620\text{ cm}^{-1}$  corresponds to N-H angular deformation in  $\text{NH}_2\text{-R}$  for all hydrochars at different temperatures [6]. A prominent peak at  $1500\text{ cm}^{-1}$  and  $1455\text{ cm}^{-1}$  could be ascribed for N-H angular deformation on secondary amine [2, 7] and C=C-C axial deformation in aromatic  $\text{C}_6\text{H}_5\text{-R}$  [2], respectively. The intensity of the peak at  $1010\text{ cm}^{-1}$  due to C-H in-plane angular deformation in aromatic  $\text{C}_6\text{H}_5\text{-R}$  increased as it changed from raw SS to hydrochar [8]. A negligible peak at  $890\text{ cm}^{-1}$  corresponding to  $\beta - 1, 4$  glycosidic bonds for raw SS showed increasing intensity with higher HTC temperature which indicates the long aliphatic bond in raw SS breaks further with increasing HTC temperature [5, 9]. A similar trend was followed by the peak found for  $700\text{ cm}^{-1}$  owing to O-H angular deformation in alcohol [10, 11]. Finally, two peaks displayed at  $600\text{ cm}^{-1}$  and  $550\text{ cm}^{-1}$  for all the hydrochars are attributed from S-S and C-S axial deformation in disulfides, respectively [2, 4]. These above-mentioned peaks are all comparable to prior experimental findings conducted on raw SS and hydrochars [4, 5, 12].

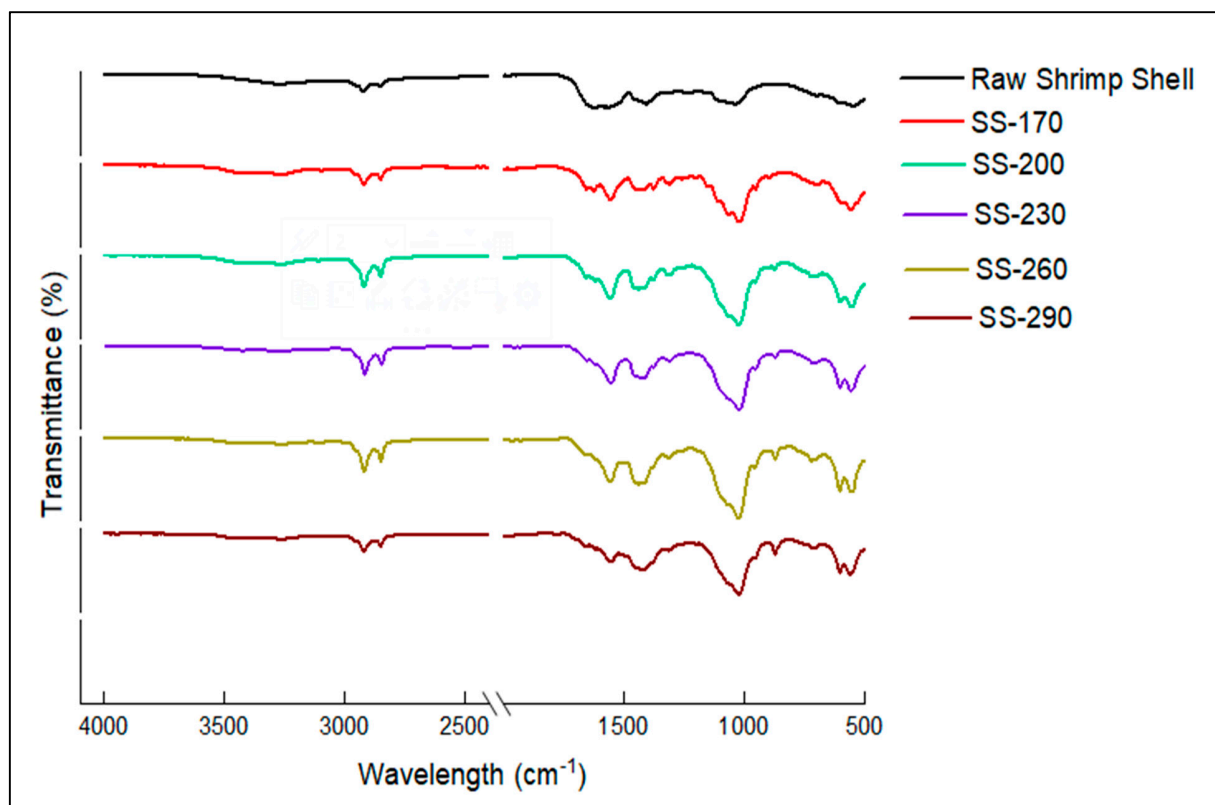

**FigureS3** FTIR spectra for raw SS and hydrochar at different temperature.

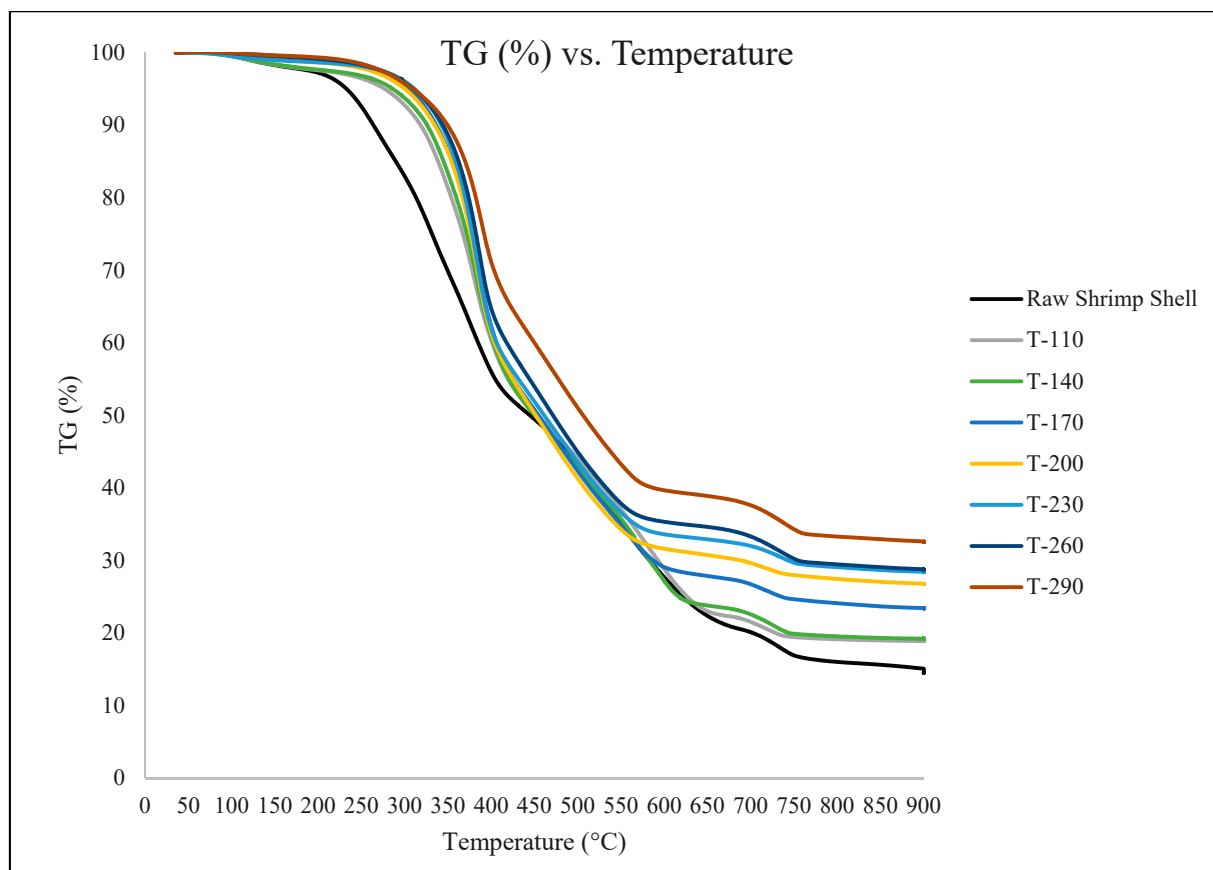

**FigureS4** TG thermogram results for raw SS and hydrochars at different temperatures.

## References

1. Tortosa Masiá, A.A., et al., *Characterising ash of biomass and waste*. Fuel Processing Technology, 2007. **88**(11-12): p. 1071-1081.
2. Coates, J., *Interpretation of Infrared Spectra, A Practical Approach*, in *Encyclopedia of Analytical Chemistry*. 2006.
3. Zhang, Y., et al., *Controlled assembly of Fe<sub>3</sub>O<sub>4</sub> magnetic nanoparticles on graphene oxide*. Nanoscale, 2011. **3**(4): p. 1446-1450.
4. Kannan, S., Y. Gariepy, and G.S.V. Raghavan, *Optimization and Characterization of Hydrochar Derived from Shrimp Waste*. Energy & Fuels, 2017. **31**(4): p. 4068-4077.
5. He, C., et al., *Waste shrimp shell-derived hydrochar as an emergent material for methyl orange removal in aqueous solutions*. Environ Int, 2020. **134**: p. 105340.
6. Allison, G.G., et al., *Measurement of key compositional parameters in two species of energy grass by Fourier transform infrared spectroscopy*. (1873-2976 (Electronic)).
7. Donald L. Pavia, G.M.L., George S. Kriz, James A. Vyvyan, *Introduction to Spectroscopy*.
8. El Ichi, S., et al., *Chitosan improves stability of carbon nanotube biocathodes for glucose biofuel cells*. Chemical Communications, 2014. **50**(93): p. 14535-14538.
9. Wysokowski, M., et al., *Modification of chitin with kraft lignin and development of new biosorbents for removal of cadmium(II) and nickel(II) ions*. (1660-3397 (Electronic)).
10. Chen, B., D. Zhou, and L. Zhu, *Transitional Adsorption and Partition of Nonpolar and Polar Aromatic Contaminants by Biochars of Pine Needles with Different Pyrolytic Temperatures*. Environmental Science & Technology, 2008. **42**(14): p. 5137-5143.
11. Hong, P.-Z., et al., *Thermogravimetric analysis of chitosan*. Journal of Applied Polymer Science, 2007. **105**(2): p. 547-551.
12. Kannan, S., Y. Gariepy, and G.S.V. Raghavan, *Conventional Hydrothermal Carbonization of Shrimp Waste*. Energy & Fuels, 2018. **32**(3): p. 3532-3542.
