# Supplementary material for: Effect of Hydrothermal Carbonization on Fuel and Combustion Properties of Shrimp Shell Waste
Source: MDPI journal article supplement (doi:10.3390/en16145534), 2023-07-21
Supplement: s1 [file s1]

Archive with 1 entries (1 files):
- energies-2501600-supplementary.pdf
